# Supplementary material for: Targeting SphK1/2 by SKI-178 inhibits prostate cancer cell growth
Source: PubMed Central journal article supplement (PMC10442381; doi:10.1038/s41419-023-06023-4), 2023-08-21

# Figure S1. The uncropped blotting images

## Figure 1

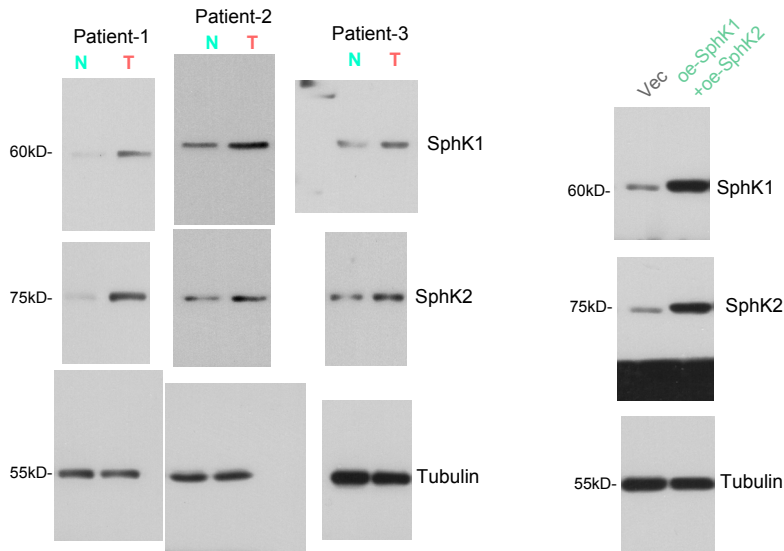

## Figure 3

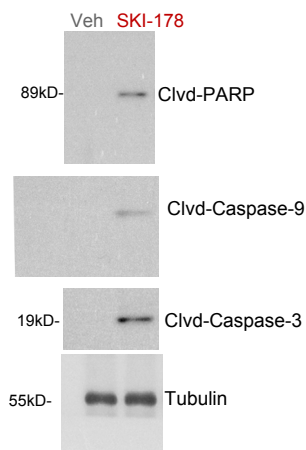

## Figure 5

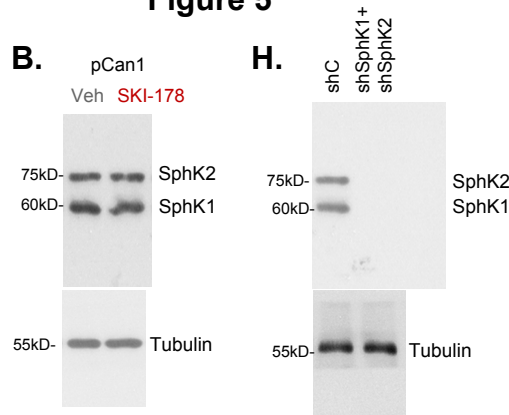

## Figure 7

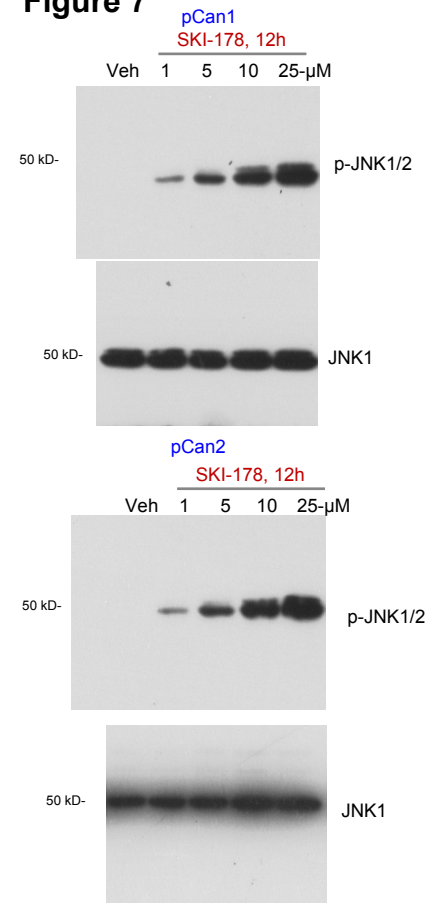

## Figure 6.

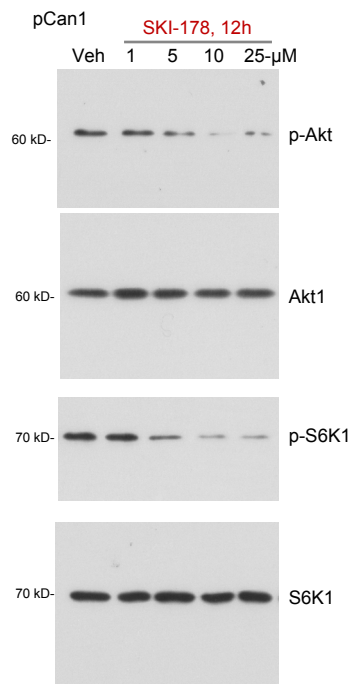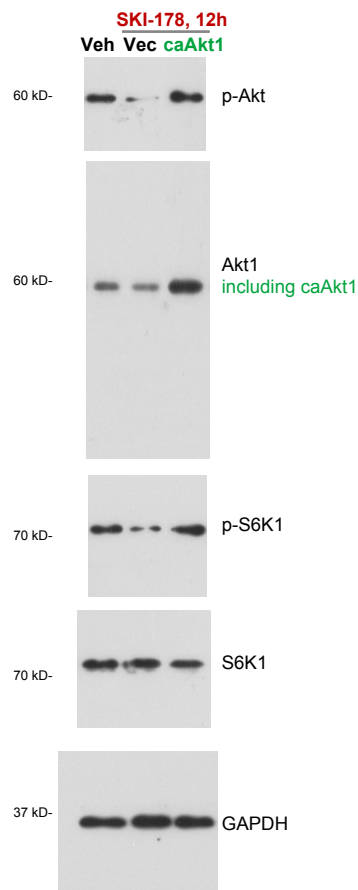

### Figure 8

Day-6 Day-12

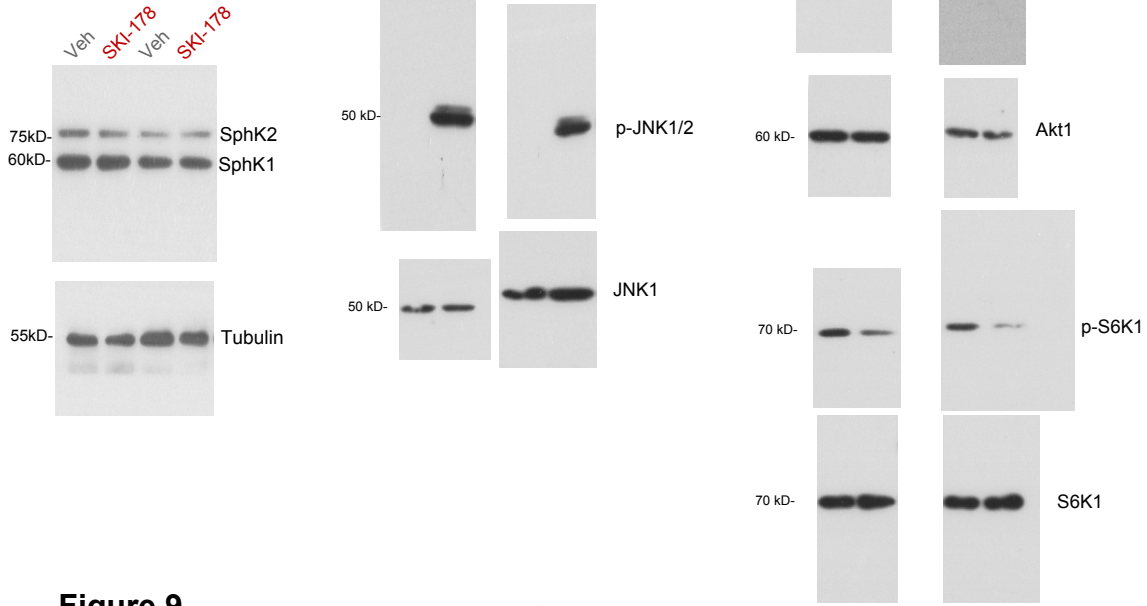

### Figure 9

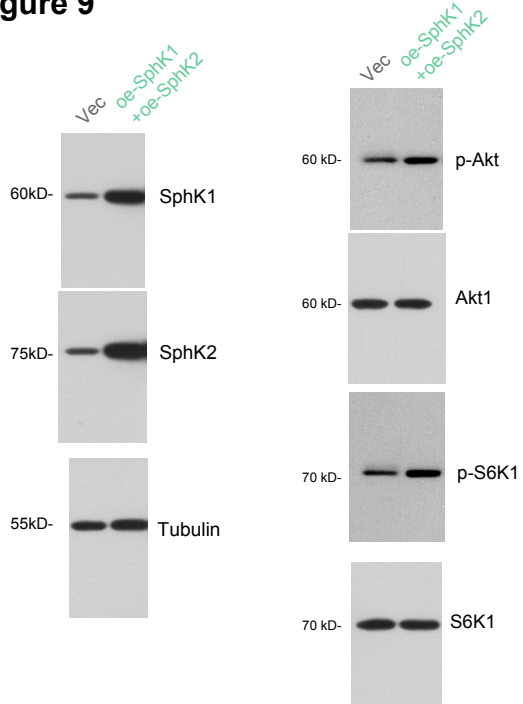

Supplement: 41419_2023_6023_MOESM1_ESM.pdf [file 41419_2023_6023_MOESM1_ESM.pdf]
