# Supplementary material for: Targeting SphK1/2 by SKI-178 inhibits prostate cancer cell growth
Source: PubMed Central journal article supplement (PMC10442381; doi:10.1038/s41419-023-06023-4), 2023-08-21
Supplement: 41419_2023_6023_MOESM3_ESM.pdf [file 41419_2023_6023_MOESM3_ESM.pdf]

Please complete the table below to indicate the contributions of all named authors to the figures.

Figure 1:

|  |
|--|
|  |
|--|

Figure 2:

|  |
|--|
|  |
|--|

Figure 3:

|  |
|--|
|  |
|--|

Figure 4:

|  |
|--|
|  |
|--|

Figure 5:

|  |
|--|
|  |
|--|

Figure 6:

|  |
|--|
|  |
|--|

Signed for and on behalf of the Author(s):

|         |
|---------|
| Wei Tao |
|---------|

Print Name:

|  |
|--|
|  |
|--|

Date:

|  |
|--|
|  |
|--|
